# Supplementary material
Source: PubMed Central journal article supplement (PMC6990854)
Supplement: jamainternmed-180-347-s001.pdf [file jamainternmed-180-347-s001.pdf]

## Supplementary Online Content

Silva GC, Jiang L, Gutman R, et al. Mortality trends for veterans hospitalized with heart failure and pneumonia using claims-based vs clinical risk-adjustment variables [published online December 20, 2019]. *JAMA Intern Med*. doi:10.1001/jamainternmed.2019.5970

**eFigure 1.** Exclusion Flowchart for the Study Population

**eFigure 2.** Number of Admissions per Quarter for the Study Population

**eFigure 3.** Percent of Admissions per Quarter with a Primary Diagnosis of Sepsis/RF [with Pneumonia as Secondary Diagnosis] in Extended Pneumonia Cohort

**eFigure 4.** Unadjusted 30-day Mortality Rates for Veterans Hospitalized with Heart Failure and Pneumonia

**eFigure 5.** Unadjusted 30-day Mortality Rates for Veterans Hospitalized with Heart Failure, Pneumonia, Pneumonia [excluding Sepsis/RF] and Sepsis/RF [with Pneumonia as Secondary Diagnosis]

**eFigure 6.** Bayesian Structural Time Series Analyses

**eFigure 7.** Risk-Standardized 30-Day Mortality Rates Among Veterans Hospitalized with Pneumonia [excluding Sepsis/RF] and Sepsis/RF [with Pneumonia as Secondary Diagnosis] from Claims-Based and Clinical Risk-Adjustment Models

**eFigure 8.** Quarterly Trends in Predicted Risk of 30-day Mortality, as Derived from Clinical and Claims-Based Risk-adjustment Models for Pneumonia [excluding Sepsis/RF] and Sepsis/RF [with Pneumonia as Secondary Diagnosis]

**eTable 1.** ICD-9 Codes for Primary Diagnoses

**eTable 2.** Summary of Missing Data for Adjustment/Summary Variables

**eTable 3.** Characteristics of Veterans Hospitalized with Pneumonia [excluding primary diagnosis of Sepsis/RF] Between the First and Last Years of the Study

**eTable 4.** Characteristics of Veterans Hospitalized with Sepsis/RF [with Pneumonia as Secondary Diagnosis] Between the First and Last Years of the Study

**eTable 5.** Characteristics of Veterans Hospitalized with Heart Failure Between the First and Last Years of the Study

**eTable 6.** Characteristics of Veterans Hospitalized with Pneumonia Between the First and Last Years of the Study

**eTable 7.** Comparison of Clinical Characteristics Between First and Last Years of Study for Patients Admitted with Heart Failure

**eTable 8.** Comparison of Clinical Characteristics Between First and Last Years of Study for Patients Admitted with Pneumonia

**eTable 9.** Comparison of Sociodemographic Characteristics Between First and Last Years for Patients Admitted with Heart Failure or Pneumonia

**eTable 10.** Changes in 30-day Mortality among Veterans Admitted with Pneumonia [excluding Sepsis/RF] and Sepsis/RF [with Pneumonia as Secondary Diagnosis]

**eTable 11.** Analyses for Area under the ROC curve (AUC)/Goodness of Fit for Claims-based and Clinical Risk-adjustment Models

**eTable 12.** Sensitivity Analyses for Multiple Admissions – First Admission

**eTable 13.** Sensitivity Analyses for Multiple Admissions – Random Admission

This supplementary material has been provided by the authors to give readers additional information about their work.

**eFigure 1. Exclusion Flowchart for the Study Population**

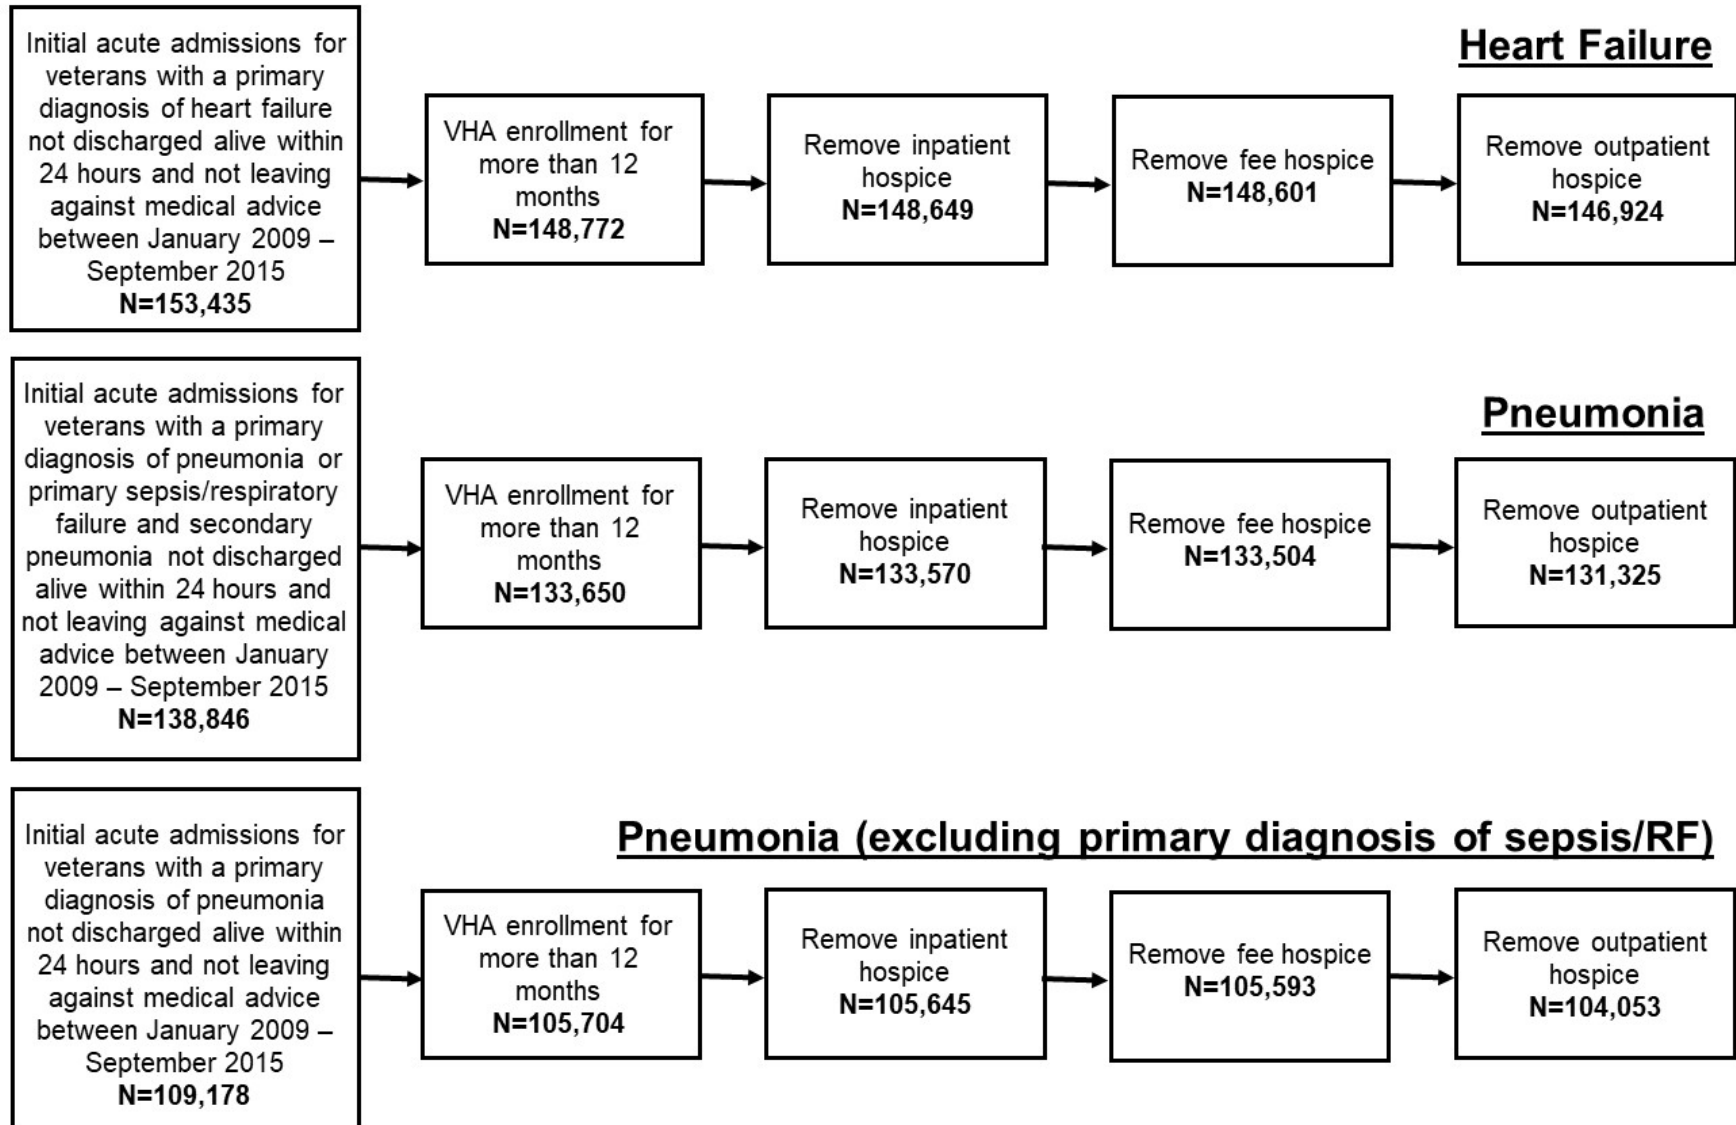

eFigure 2. Number of Admissions Per Quarter in the Study Population

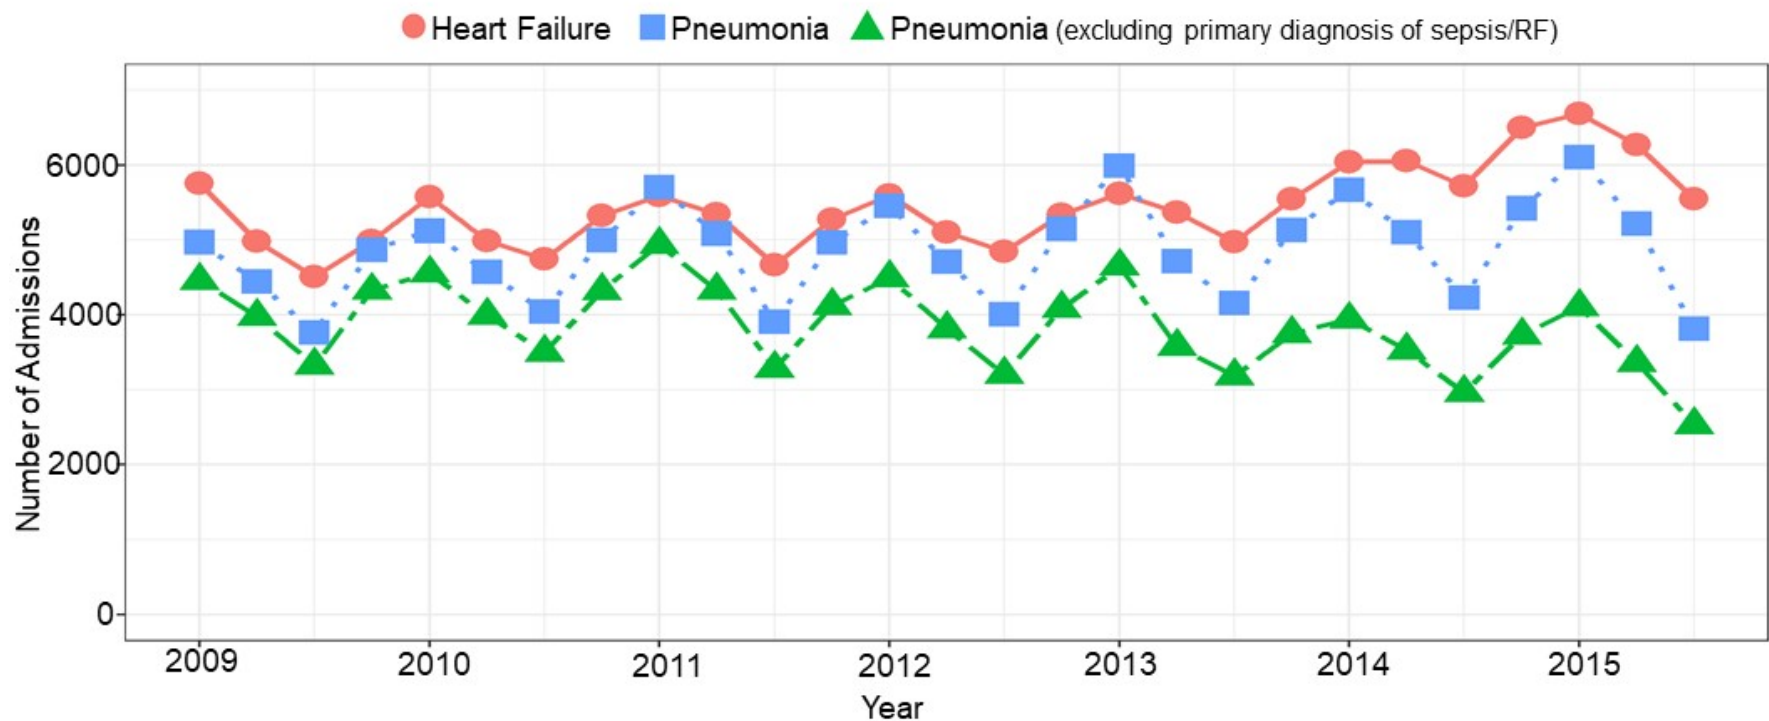

Each point corresponds to the number of admissions for each quarter between January-March 2009 to July-September 2015

**eFigure 3. Percent of Admissions per Quarter with a Primary Diagnosis of Sepsis/RF [with Pneumonia as Secondary Diagnosis] in Pneumonia Cohort**

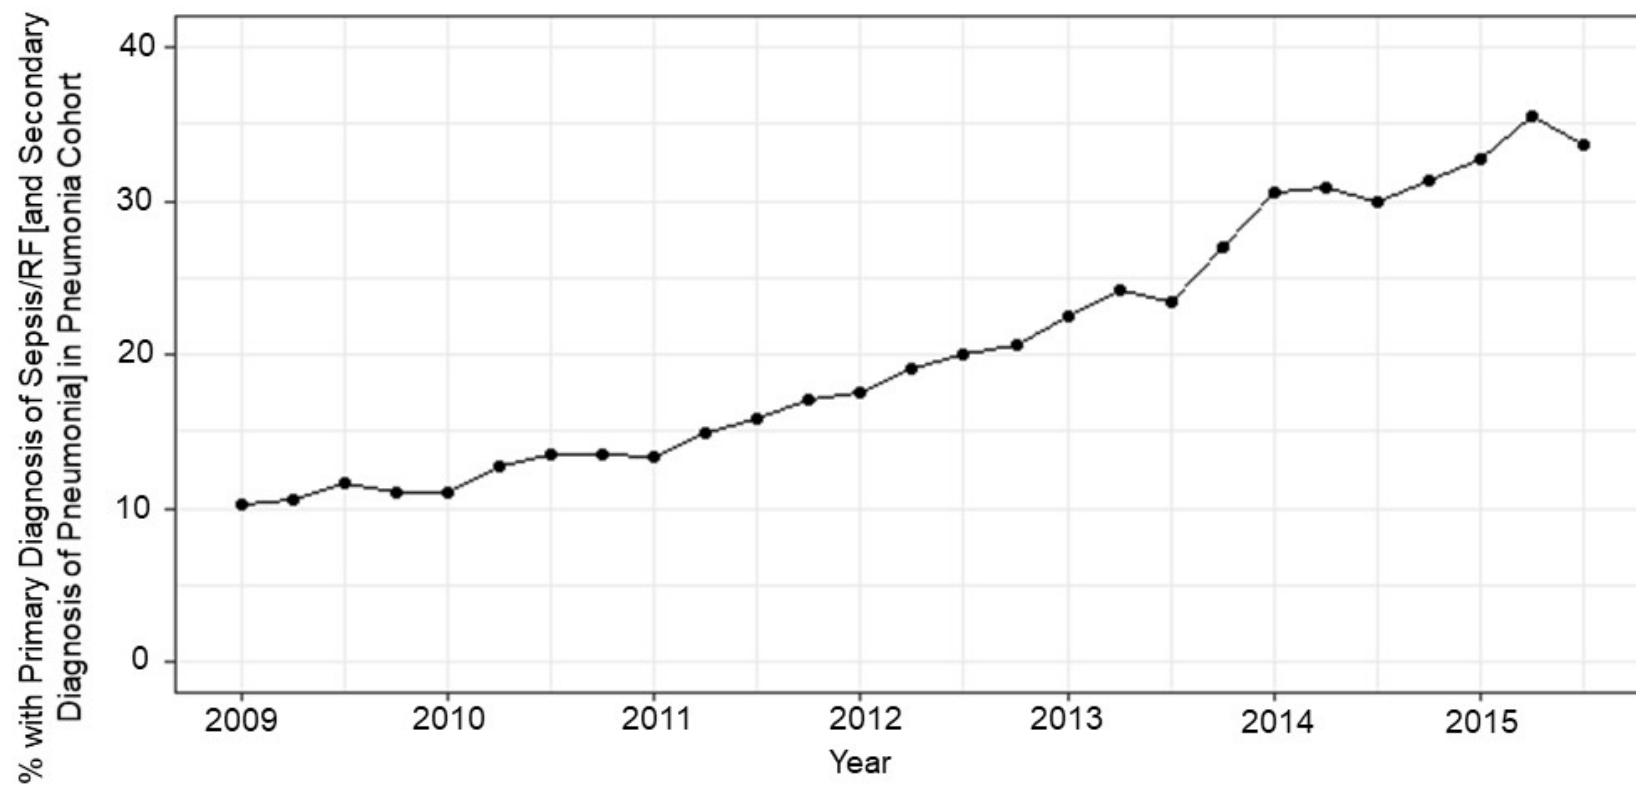

**eFigure 4. Unadjusted 30-day Mortality Rates for Veterans Hospitalized with Heart Failure and Pneumonia**

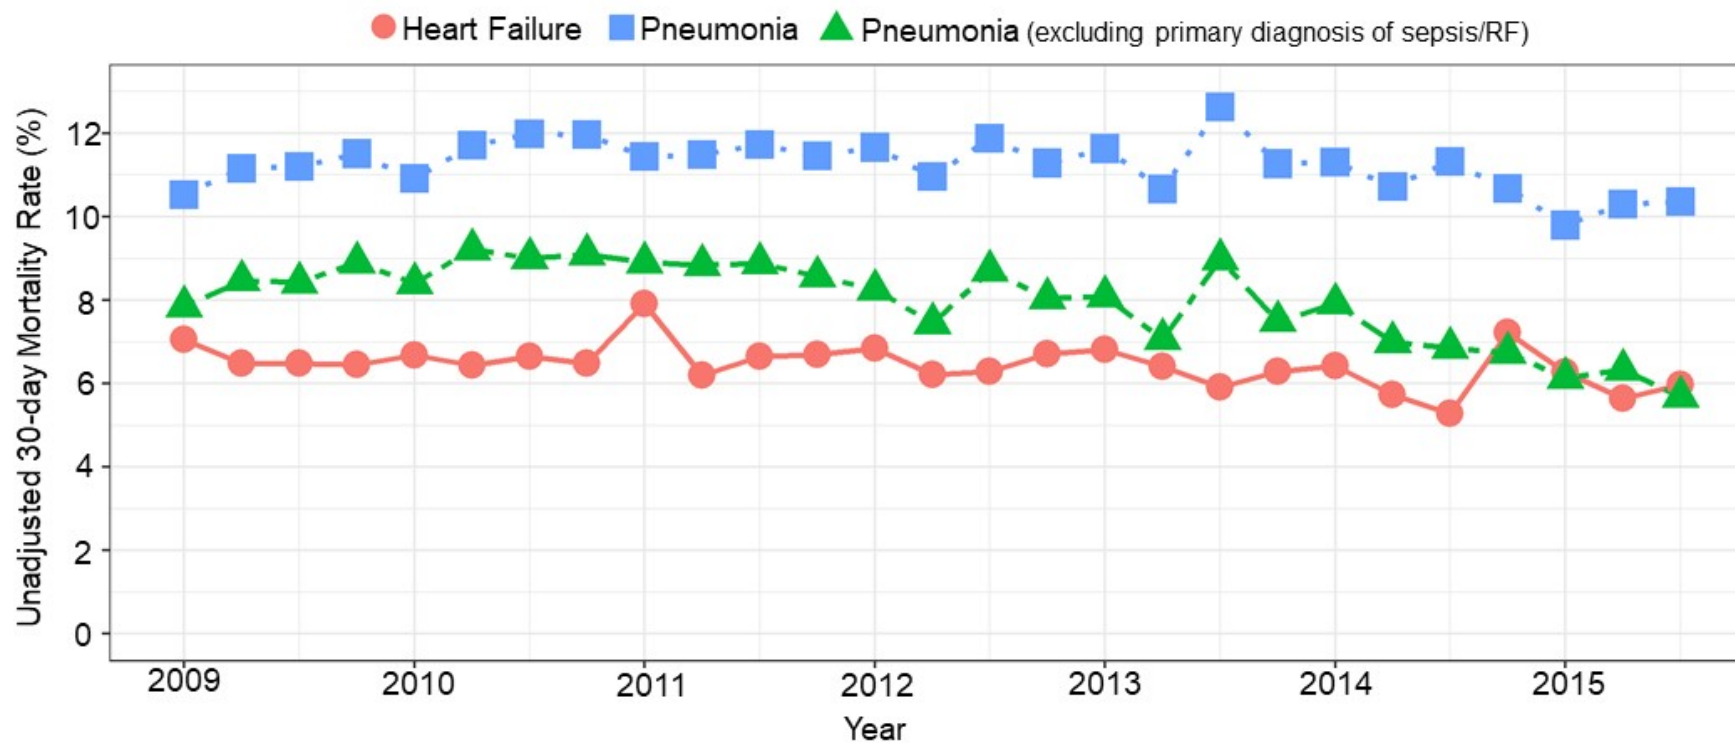

Each point corresponds to the unadjusted mortality rate for each quarter between January-March 2009 to July-September 2015

**eFigure 5. Unadjusted 30-day Mortality Rates for Veterans Hospitalized with Heart Failure, Pneumonia, Pneumonia [excluding Sepsis/RF] and Sepsis/RF [with Pneumonia as Secondary Diagnosis]**

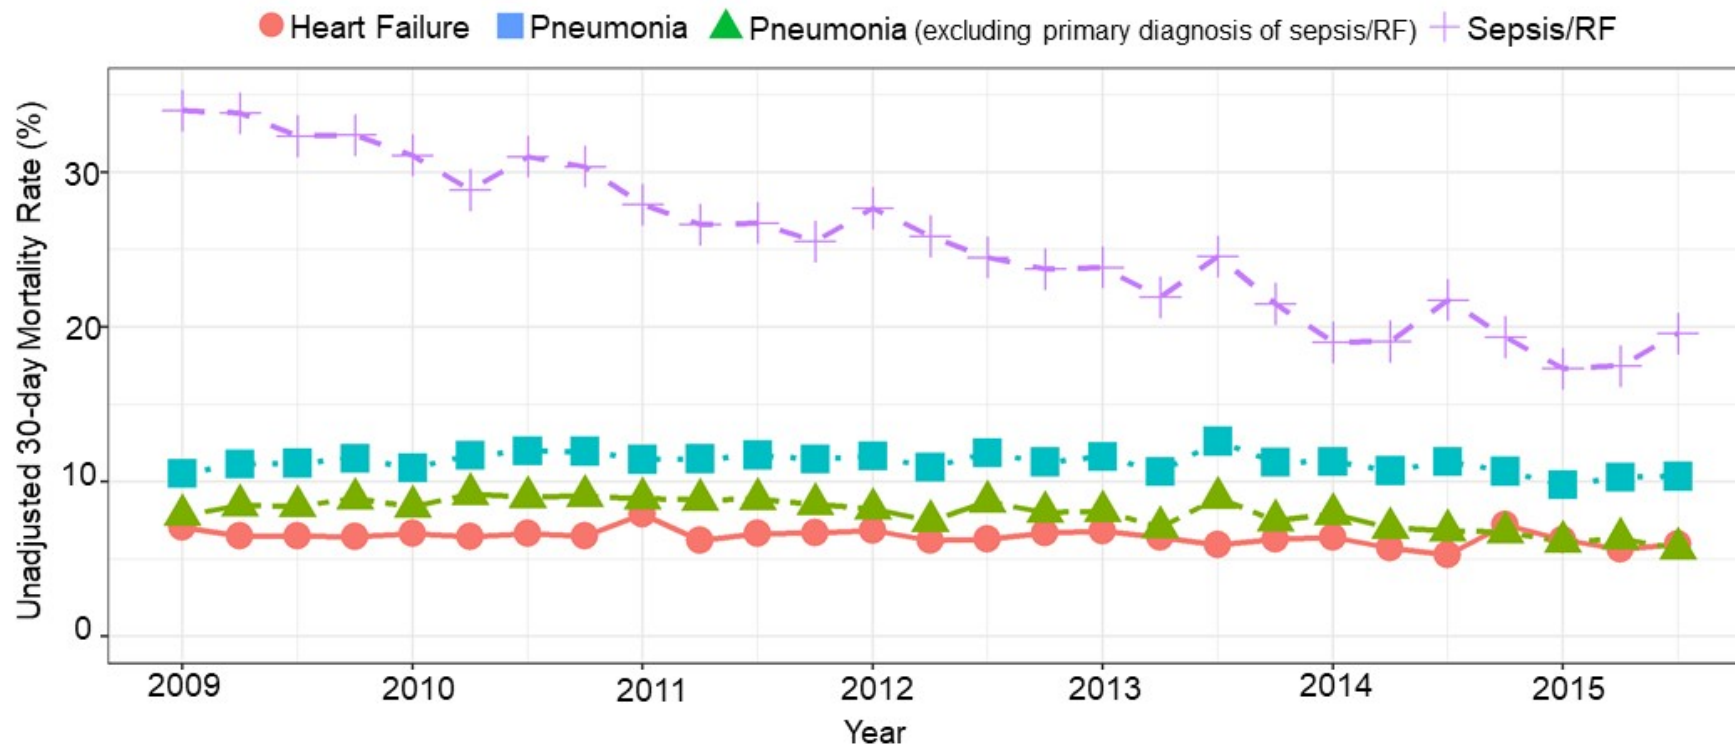

Each point corresponds to the unadjusted mortality rate for each quarter between January-March 2009 to July-September 2015

**eFigure 6. Bayesian Structural Time Series Analyses**

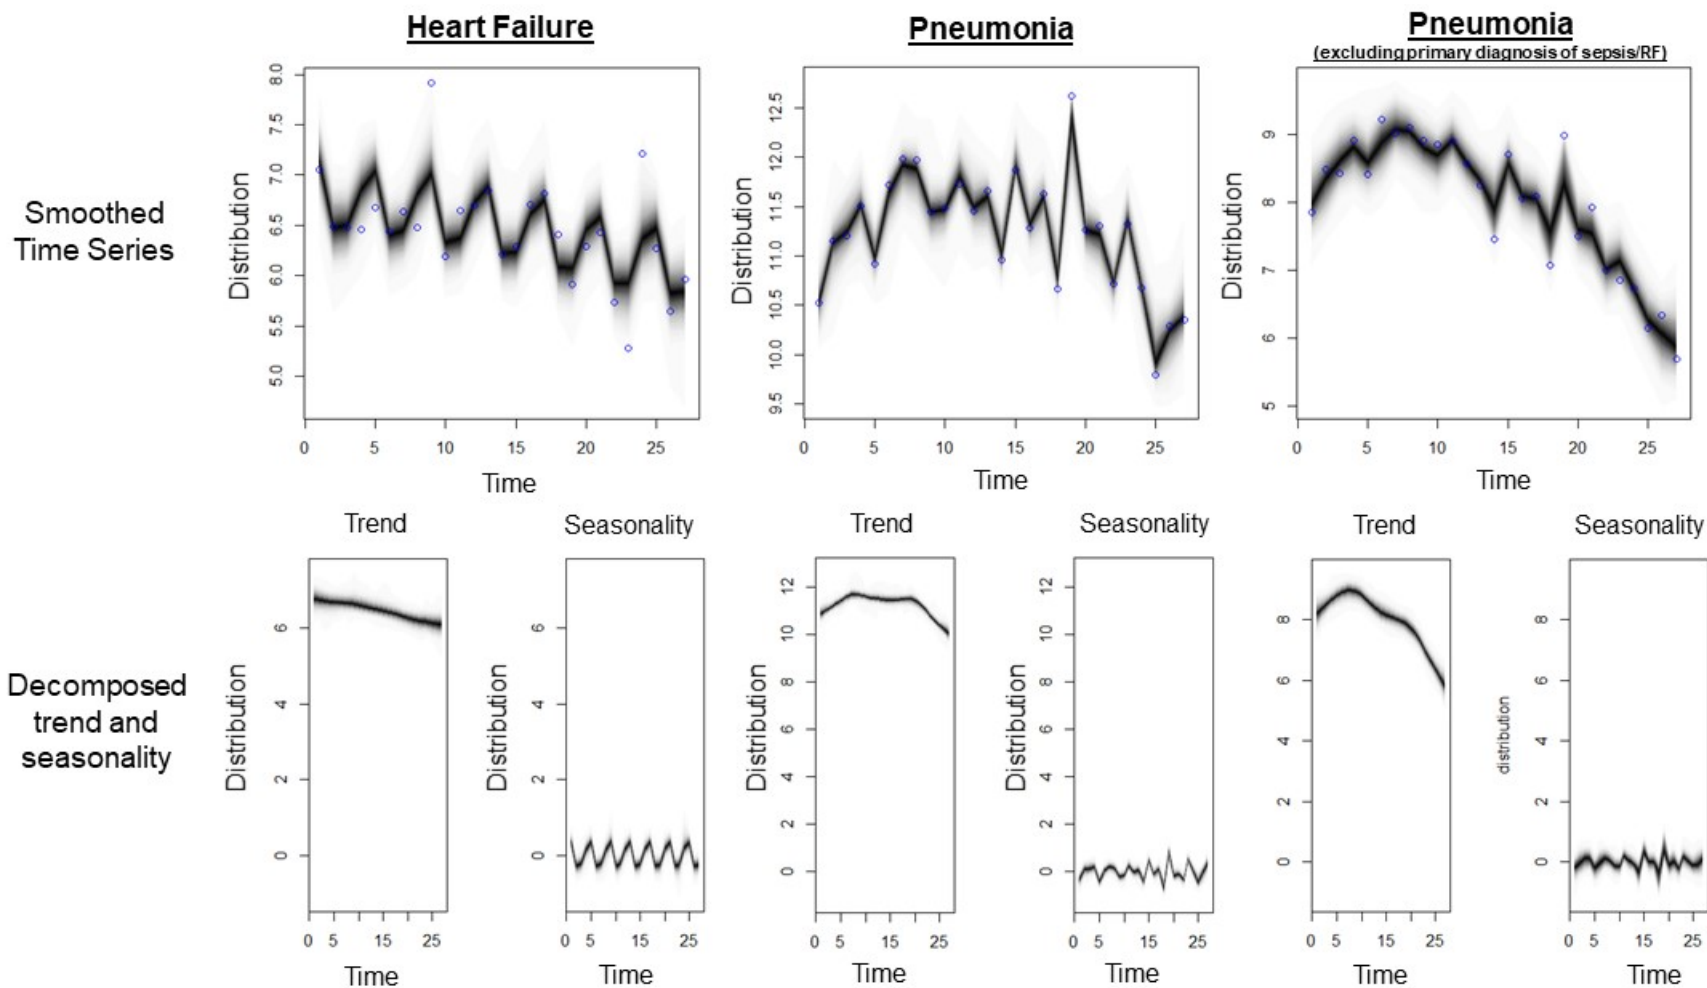

Bayesian Structural Time Series Models work with time series data and can decompose a time series into its state components like trend and seasonality. Time refers to admission quarter. This model extracts the trend from unadjusted 30-day mortality rates upon having accounted for its seasonal variations.



**eFigure 7. Risk-Standardized 30-Day Mortality Rates Among Veterans Hospitalized with Pneumonia [excluding Sepsis/RF] and Sepsis/RF [with Pneumonia as Secondary Diagnosis] from Claims-Based and Clinical Risk-Adjustment Models**

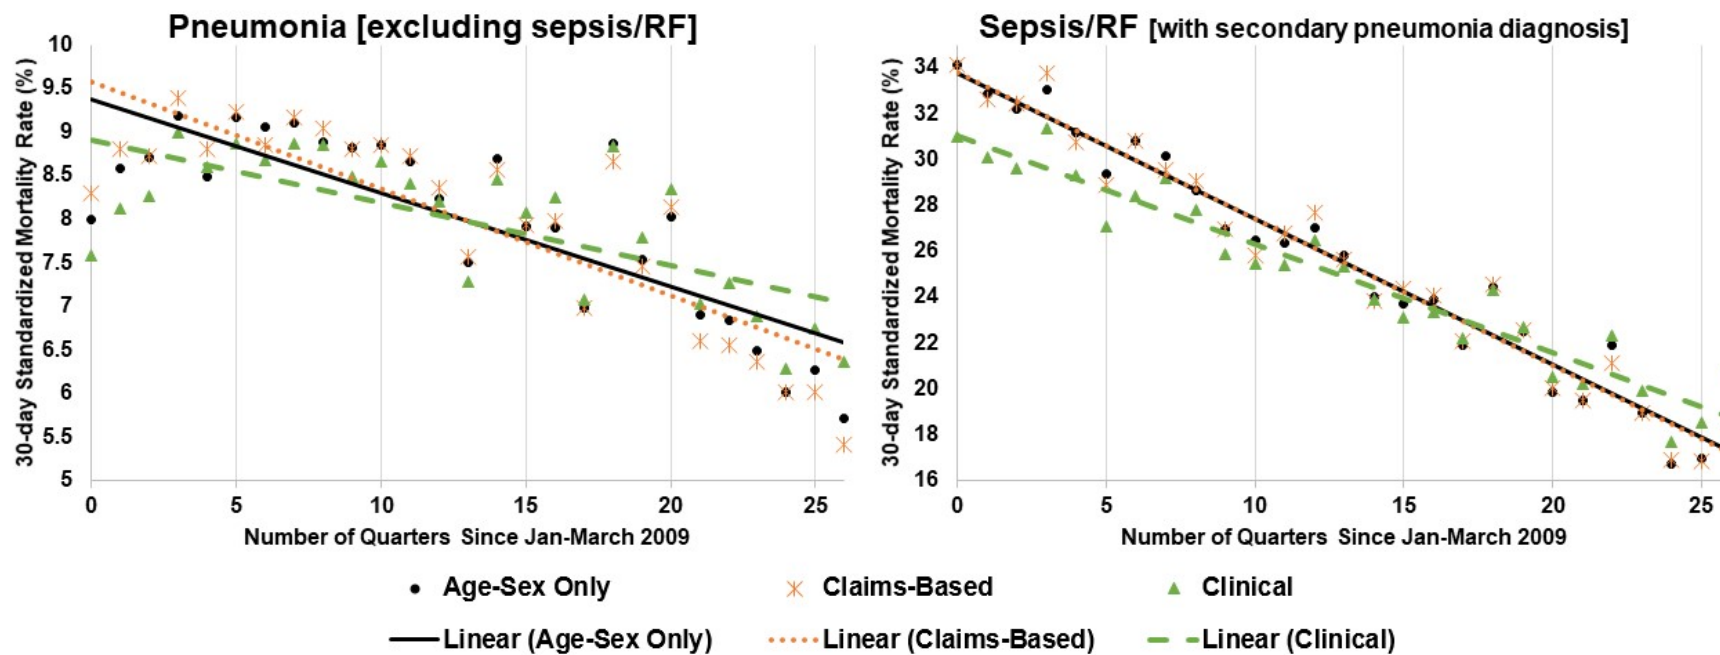

**Caption:** Each point corresponds to the risk-standardized 30-day mortality rate in each quarter between January-March 2009 and July-September 2015 for the reference population of interest.

**eFigure 8. Quarterly Trends in Predicted Risk of 30-day Mortality, as Derived from Clinical and Claims-Based Risk-adjustment Models for Pneumonia [excluding Sepsis/RF] and Sepsis/RF [with Pneumonia as Secondary Diagnosis]**

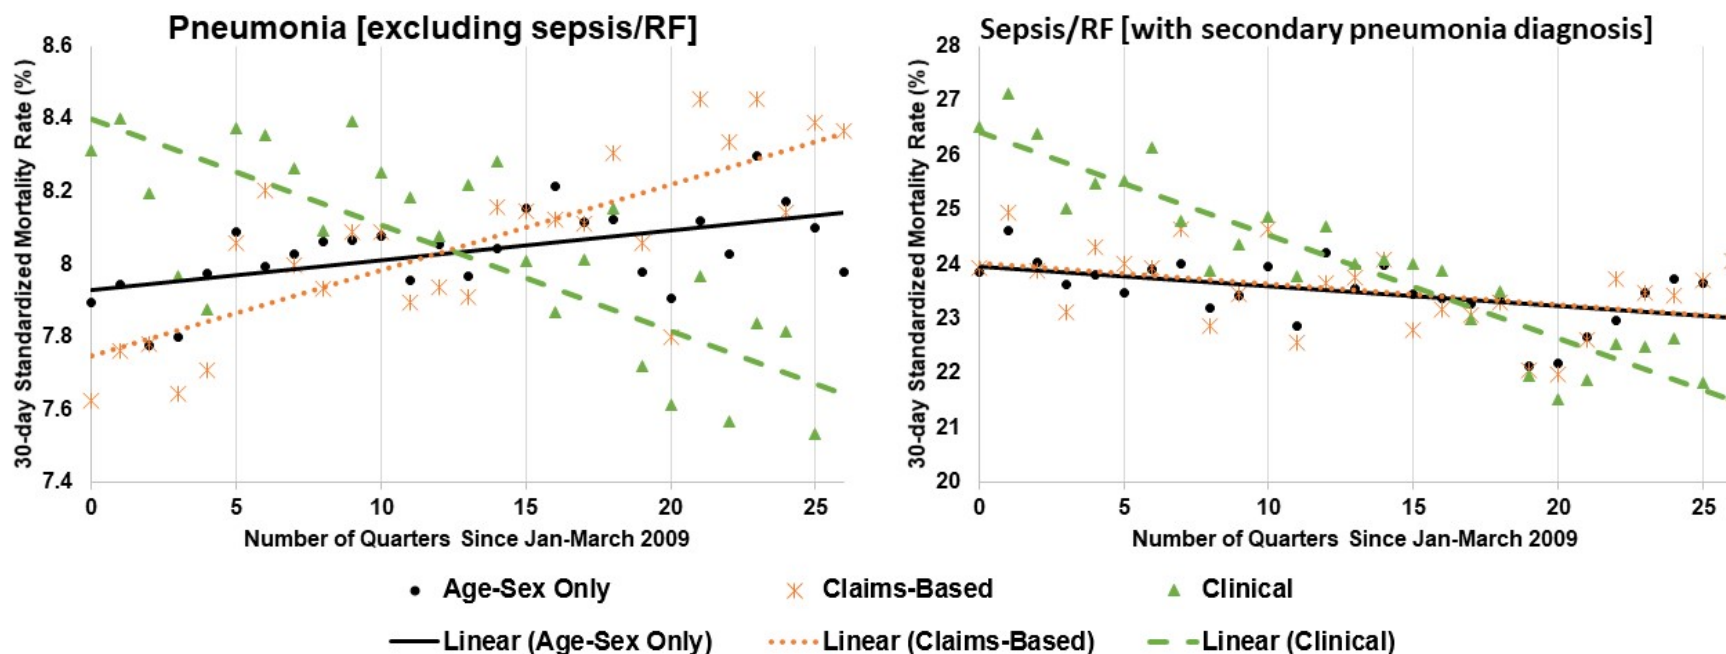

**Caption:** Each point corresponds to the predicted risk of 30-day mortality in each quarter between January-March 2009 and July-September 2015.

**eTable 1. ICD-9 Codes for Primary Diagnoses**

| <b>Primary Diagnoses</b>                                    | <b>ICD-9 Codes/Descriptions</b>                                                                                                                                                                                                                                                                                                                                                                                                                                                                                                                                                                                                                                                                                                                                                                                                                                                                                                                                                                                                |
|-------------------------------------------------------------|--------------------------------------------------------------------------------------------------------------------------------------------------------------------------------------------------------------------------------------------------------------------------------------------------------------------------------------------------------------------------------------------------------------------------------------------------------------------------------------------------------------------------------------------------------------------------------------------------------------------------------------------------------------------------------------------------------------------------------------------------------------------------------------------------------------------------------------------------------------------------------------------------------------------------------------------------------------------------------------------------------------------------------|
| <i>Heart Failure</i>                                        | 402.01, 402.11, 402.91, 404.01, 404.03, 404.11, 404.13, 404.91, 404.93, 428.0, 428.1, 428.20, 428.21, 428.22, 428.23, 428.30, 428.31, 428.32, 428.33, 428.40, 428.41, 428.42, 428.43, and 428.9                                                                                                                                                                                                                                                                                                                                                                                                                                                                                                                                                                                                                                                                                                                                                                                                                                |
| <i>Pneumonia</i>                                            | 480.0, 480.1, 480.2, 480.3, 480.8, 480.9, 481, 482.0, 482.1, 482.2, 482.30, 482.31, 482.32, 482.39, 482.40, 482.41, 482.42, 482.49, 482.81, 482.82, 482.83, 482.84, 482.89, 482.9, 483.0, 483.1, 483.8, 485, 486, 487.0, and 488.11                                                                                                                                                                                                                                                                                                                                                                                                                                                                                                                                                                                                                                                                                                                                                                                            |
| <i>Sepsis or RF [with secondary diagnosis of pneumonia]</i> | 38 STREPTOCOCCAL SEPTICEMIA<br>38.1 STAPHYLOCOCCAL SEPTICEMIA<br>38.1 STAPHYLOCOCCAL SEPTICEMIA, UNSPECIFIED<br>38.11 STAPHYLOCOCCUS AUREUS SEPTICEMIA<br>38.11 METHICILLIN SUSCEPTIBLE STAPHYLOCOCCUS AUREUS SEPTICEMIA<br>38.12 METHICILLIN RESISTANT STAPHYLOCOCCUS AUREUS SEPTICEMIA<br>38.19 OTHER STAPHYLOCOCCAL SEPTICEMIA<br>38.2 PNEUMOCOCCAL SEPTICEMIA<br>38.3 SEPTICEMIA DUE TO ANAEROBES<br>38.4 SEPTICEMIA DUE TO GRAM-NEGATIVE ORGANISM, UNSPECIFIED<br>38.41 SEPTICEMIA DUE TO HEMOPHILUS INFLUENZAE (H. INFLUENZAE)<br>38.42 SEPTICEMIA DUE TO ESCHERICHIA COLI (E. COLI)<br>38.43 SEPTICEMIA DUE TO PSEUDOMONAS<br>38.44 SEPTICEMIA DUE TO SERRATIA<br>38.49 OTHER SEPTICEMIA DUE TO GRAM-NEGATIVE ORGANISMS<br>38.8 OTHER SPECIFIED SEPTICEMIAS<br>38.9 UNSPECIFIED SEPTICEMIA<br>518.81 ACUTE RESPIRATORY FAILURE<br>518.82 OTHER PULMONARY INSUFFICIENCY, NEC<br>518.84 ACUTE AND CHRONIC RESPIRATORY FAILURE<br>785.52 SEPTIC SHOCK<br>799.1 RESPIRATORY ARREST<br>995.91 SEPSIS<br>995.92 SEVERE SEPSIS |

**eTable 2. Summary of Missing Data for Adjustment/Summary Variables**

| Variable                            | Heart Failure<br>(n=146,924) |      | Pneumonia<br>(n=131,325) |      | Pneumonia<br>[excluding Sepsis/RF]<br>(n=104,053) |      |
|-------------------------------------|------------------------------|------|--------------------------|------|---------------------------------------------------|------|
|                                     | Number Missing               | %    | Number Missing           | %    | Number Missing                                    | %    |
| Systolic Blood Pressure             | 3,146                        | 2.1  | 2,467                    | 1.9  | 1,326                                             | 1.3  |
| Diastolic Blood Pressure            | 1,340                        | 0.9  | 308                      | 0.2  | 153                                               | 0.1  |
| Heart Rate                          | 66                           | <0.1 | 25                       | <0.1 | 13                                                | <0.1 |
| Respiratory Rate                    | 1,158                        | 0.8  | 45                       | <0.1 | 16                                                | <0.1 |
| Blood Urea Nitrogen                 | 8,834                        | 6.0  | 7,658                    | 5.8  | 5,548                                             | 5.3  |
| Oxygen Saturation                   | 811                          | 0.6  | 33                       | <0.1 | 14                                                | <0.1 |
| Creatinine                          | 1,505                        | 1.0  | 1,067                    | 0.8  | 915                                               | 0.9  |
| Potassium                           | 5,211                        | 3.5  | 4,139                    | 3.2  | 3,479                                             | 3.3  |
| Hematocrit                          | 6,162                        | 4.2  | 5,740                    | 4.4  | 5,018                                             | 4.8  |
| B-type Natriuretic Peptide          | 18,631                       | 12.7 | -                        | -    | -                                                 | -    |
| Body Mass Index                     | 22,059                       | 15.0 | 11,310                   | 8.6  | 8,217                                             | 7.9  |
| Left- Ventricular Ejection Fraction | 49,043                       | 33.4 | -                        | -    | -                                                 | -    |
| Sodium                              | 4,524                        | 3.1  | 3,567                    | 2.7  | 2,972                                             | 2.9  |
| Serum Glucose                       | -                            | -    | 4,892                    | 3.7  | 4,102                                             | 3.9  |
| Area Deprivation Index              | 1,741                        | 1.2  | 2,044                    | 1.6  | 1,373                                             | 1.3  |
| Race/Ethnicity                      | 749                          | 0.5  | 889                      | 0.7  | 666                                               | 0.6  |

Note: The number of missing values for Sepsis/RF can be calculated by subtracting the number missing for Pneumonia [excluding Sepsis/RF] from the number missing for Pneumonia.

**eTable 3. Characteristics of Veterans Hospitalized with Pneumonia [excluding primary diagnosis of Sepsis/RF] Between the First and Last Years of the Study**

| Characteristic                              |                                                | First Year <sup>a</sup><br>(n=16,091) | Last Year <sup>b</sup><br>(n=13,727) | Standardized<br>Difference |
|---------------------------------------------|------------------------------------------------|---------------------------------------|--------------------------------------|----------------------------|
| Age (years)                                 |                                                | 69.9 ± 12.7                           | 71.9 ± 12.1                          | 0.16                       |
| Male                                        |                                                | 15,642 (97.2)                         | 13,263 (96.6)                        | 0.03                       |
| Claims-Based Comorbid Conditions            | Percutaneous Transluminal Coronary Angioplasty | 656 (4.1)                             | 782 (5.7)                            | 0.08                       |
|                                             | Coronary Artery Bypass Graft                   | 1,312 (8.2)                           | 1,019 (7.4)                          | 0.03                       |
|                                             | Congestive Heart Failure                       | 4,332 (26.9)                          | 4,030 (29.4)                         | 0.05                       |
|                                             | Acute Myocardial Infarction                    | 416 (2.6)                             | 339 (2.5)                            | 0.01                       |
|                                             | Ischemic Heart Disease                         | 649 (4.0)                             | 685 (5.0)                            | 0.05                       |
|                                             | Chronic Atherosclerosis                        | 5,843 (36.3)                          | 5,083 (37.0)                         | 0.02                       |
|                                             | Cardiorespiratory Failure and Shock            | 2,132 (13.2)                          | 2,718 (19.8)                         | 0.18                       |
|                                             | Hypertension                                   | 11,838 (73.6)                         | 10,417 (75.9)                        | 0.05                       |
|                                             | Stroke                                         | 1,431 (8.9)                           | 1,247 (9.1)                          | 0.01                       |
|                                             | Cerebrovascular                                | 1,675 (10.4)                          | 1,521 (11.1)                         | 0.02                       |
|                                             | Renal Failure                                  | 3,822 (23.8)                          | 4,251 (31.0)                         | 0.16                       |
|                                             | Chronic Obstructive Pulmonary Disease          | 7,820 (48.6)                          | 7,032 (51.2)                         | 0.05                       |
|                                             | Pneumonia                                      | 5,834 (36.3)                          | 5,537 (40.3)                         | 0.08                       |
|                                             | Malnutrition                                   | 709 (4.4)                             | 705 (5.1)                            | 0.03                       |
|                                             | Dementia/Senility                              | 2,175 (13.5)                          | 2,115 (15.4)                         | 0.05                       |
|                                             | Functional Disability                          | 1,451 (9.0)                           | 1,202 (8.8)                          | 0.01                       |
|                                             | Peripheral Vascular Disease                    | 3,432 (21.3)                          | 3,267 (23.8)                         | 0.06                       |
|                                             | Cancer                                         | 1,729 (10.7)                          | 1,632 (11.9)                         | 0.04                       |
|                                             | Trauma                                         | 4,426 (27.5)                          | 4,007 (29.2)                         | 0.04                       |
|                                             | Major Psychiatric Disease                      | 2,926 (18.2)                          | 2,780 (20.3)                         | 0.05                       |
|                                             | Chronic Liver Disease                          | 885 (5.5)                             | 893 (6.5)                            | 0.04                       |
|                                             | Hematological Disorder                         | 435 (2.7)                             | 310 (2.3)                            | 0.03                       |
|                                             | Iron Deficiency                                | 5,715 (35.5)                          | 5,161 (37.6)                         | 0.04                       |
|                                             | Depression                                     | 3,853 (23.9)                          | 3,521 (25.7)                         | 0.04                       |
|                                             | Parkinson's Disease                            | 393 (2.4)                             | 348 (2.5)                            | 0.01                       |
|                                             | Seizure Disorder                               | 759 (4.7)                             | 611 (4.5)                            | 0.01                       |
|                                             | Lung Fibrosis                                  | 1,208 (7.5)                           | 1,143 (8.3)                          | 0.03                       |
|                                             | Asthma                                         | 914 (5.7)                             | 855 (6.2)                            | 0.02                       |
|                                             | Vertebral Fracture                             | 182 (1.1)                             | 235 (1.7)                            | 0.05                       |
|                                             | Surgical Admission                             | 645 (4.0)                             | 545 (4.0)                            | 0.00                       |
| <i>Number of Claims-Based Comorbidities</i> | 4.9 ± 3.1                                      | 5.4 ± 3.2                             | 0.14                                 |                            |
| Clinical                                    | Systolic Blood Pressure (mmHg) †               | 127.6 ± 22.7                          | 130.5 ± 21.7                         | 0.13                       |
|                                             | Diastolic Blood Pressure (mmHg) †              | 71.0 ± 15.0                           | 71.9 ± 13.2                          | 0.07                       |
|                                             | Heart Rate †                                   | 89.4 ± 18.6                           | 87.5 ± 17.2                          | 0.11                       |
|                                             | Respiratory Rate †                             | 21.6 ± 14.2                           | 19.7 ± 5.1                           | 0.17                       |
|                                             | Oxygen Saturation (%) †                        | 94.4 ± 6.6                            | 94.9 ± 3.3                           | 0.10                       |
|                                             | Body Mass Index (kg/m <sup>2</sup> ) †         | 27.0 ± 6.9                            | 27.5 ± 6.9                           | 0.07                       |
|                                             | Sodium (mEq/L) †                               | 136.6 ± 4.6                           | 136.6 ± 4.4                          | 0.00                       |
|                                             | Potassium (mEq/L) †                            | 4.1 ± 0.6                             | 4.1 ± 0.5                            | 0.02                       |
|                                             | Blood Urea Nitrogen (mg/dL) †                  | 23.0 ± 13.9                           | 22.6 ± 13.5                          | 0.03                       |
|                                             | Creatinine (mg/dL) †                           | 1.4 ± 1.1                             | 1.4 ± 1.2                            | 0.02                       |
|                                             | Hematocrit (%) †                               | 36.5 ± 5.9                            | 37.1 ± 6.2                           | 0.09                       |
|                                             | Serum Glucose (mg/dL) †                        | 136.2 ± 52.6                          | 137.4 ± 53.7                         | 0.02                       |
|                                             | Inpatient admission 30 days prior              | 2,886 (17.9)                          | 2,751 (20.0)                         | 0.05                       |

Mean ± SD reported for continuous variables; Count (Rate) reported for categorical variables

<sup>a</sup>: First Year=January 2009 – December 2009

<sup>b</sup>: Last Year = October 2014 – September 2015

†: Summary statistics reported among non-missing values

**eTable 4. Characteristics of Veterans Hospitalized with Sepsis/RF [with Pneumonia as Secondary Diagnosis] Between the First and Last Years of the Study**

| Characteristic                   |                                                | First Year <sup>a</sup><br>(n=1,958) | Last Year <sup>b</sup><br>(n=6,828) | Standardized<br>Difference |
|----------------------------------|------------------------------------------------|--------------------------------------|-------------------------------------|----------------------------|
| Age (years)                      |                                                | 69.6 ± 11.6                          | 70.9 ± 11.8                         | 0.11                       |
| Male                             |                                                | 1,904 (97.2)                         | 6,609 (96.8)                        | 0.03                       |
| Claims-Based Comorbid Conditions | Percutaneous Transluminal Coronary Angioplasty | 81 (4.1)                             | 378 (5.5)                           | 0.06                       |
|                                  | Coronary Artery Bypass Graft                   | 159 (8.1)                            | 473 (6.9)                           | 0.04                       |
|                                  | Congestive Heart Failure                       | 619 (31.6)                           | 2,236 (32.7)                        | 0.02                       |
|                                  | Acute Myocardial Infarction                    | 80 (4.1)                             | 270 (4.0)                           | 0.01                       |
|                                  | Ischemic Heart Disease                         | 100 (5.1)                            | 418 (6.1)                           | 0.04                       |
|                                  | Chronic Atherosclerosis                        | 679 (34.7)                           | 2,423 (35.5)                        | 0.02                       |
|                                  | Cardiorespiratory Failure and Shock            | 496 (25.3)                           | 2,034 (29.8)                        | 0.10                       |
|                                  | Hypertension                                   | 1,464 (74.8)                         | 5,206 (76.2)                        | 0.03                       |
|                                  | Stroke                                         | 191 (9.8)                            | 646 (9.5)                           | 0.01                       |
|                                  | Cerebrovascular                                | 223 (11.4)                           | 769 (11.3)                          | 0.00                       |
|                                  | Renal Failure                                  | 559 (28.5)                           | 2,427 (35.5)                        | 0.15                       |
|                                  | Chronic Obstructive Pulmonary Disease          | 970 (49.5)                           | 3,518 (51.5)                        | 0.04                       |
|                                  | Pneumonia                                      | 702 (35.9)                           | 2,769 (40.6)                        | 0.10                       |
|                                  | Malnutrition                                   | 128 (6.5)                            | 519 (7.6)                           | 0.04                       |
|                                  | Dementia/Senility                              | 295 (15.1)                           | 1,186 (17.4)                        | 0.06                       |
|                                  | Functional Disability                          | 232 (11.8)                           | 756 (11.1)                          | 0.02                       |
|                                  | Peripheral Vascular Disease                    | 432 (22.1)                           | 1,761 (25.8)                        | 0.09                       |
|                                  | Cancer                                         | 238 (12.2)                           | 915 (13.4)                          | 0.04                       |
|                                  | Trauma                                         | 566 (28.9)                           | 2,035 (29.8)                        | 0.02                       |
|                                  | Major Psychiatric Disease                      | 372 (19.0)                           | 1,371 (20.1)                        | 0.03                       |
|                                  | Chronic Liver Disease                          | 150 (7.7)                            | 565 (8.3)                           | 0.02                       |
|                                  | Hematological Disorder                         | 63 (3.2)                             | 161 (2.4)                           | 0.05                       |
|                                  | Iron Deficiency                                | 768 (39.2)                           | 2,739 (40.1)                        | 0.02                       |
|                                  | Depression                                     | 459 (23.4)                           | 1,769 (25.9)                        | 0.06                       |
|                                  | Parkinson's Disease                            | 51 (2.6)                             | 198 (2.9)                           | 0.02                       |
|                                  | Seizure Disorder                               | 123 (6.3)                            | 381 (5.6)                           | 0.03                       |
|                                  | Lung Fibrosis                                  | 166 (8.5)                            | 553 (8.1)                           | 0.01                       |
|                                  | Asthma                                         | 81 (4.1)                             | 374 (5.5)                           | 0.06                       |
|                                  | Vertebral Fracture                             | 23 (1.2)                             | 156 (2.3)                           | 0.08                       |
|                                  | Surgical Admission                             | 93 (4.7)                             | 391 (5.7)                           | 0.04                       |
|                                  | <i>Number of Claims-Based Comorbidities</i>    |                                      | 5.4 ± 3.3                           | 5.8 ± 3.4                  |
| Clinical                         | Systolic Blood Pressure (mmHg) †               | 118.2 ± 26.4                         | 124.8 ± 23.6                        | 0.26                       |
|                                  | Diastolic Blood Pressure (mmHg) †              | 68.0 ± 18.8                          | 70.3 ± 14.6                         | 0.14                       |
|                                  | Heart Rate †                                   | 96.8 ± 22.0                          | 94.7 ± 19.9                         | 0.10                       |
|                                  | Respiratory Rate †                             | 24.3 ± 21.7                          | 21.1 ± 10.6                         | 0.19                       |
|                                  | Oxygen Saturation (%) †                        | 93.9 ± 10.5                          | 94.8 ± 5.2                          | 0.11                       |
|                                  | Body Mass Index (kg/m <sup>2</sup> ) †         | 27.3 ± 8.2                           | 27.4 ± 7.5                          | 0.02                       |
|                                  | Sodium (mEq/L) †                               | 137.0 ± 6.1                          | 136.7 ± 5.3                         | 0.05                       |
|                                  | Potassium (mEq/L) †                            | 4.2 ± 0.7                            | 4.1 ± 0.6                           | 0.12                       |
|                                  | Blood Urea Nitrogen (mg/dL) †                  | 30.5 ± 17.8                          | 26.6 ± 16.2                         | 0.23                       |
|                                  | Creatinine (mg/dL) †                           | 1.8 ± 1.5                            | 1.6 ± 1.4                           | 0.12                       |
|                                  | Hematocrit (%) †                               | 35.8 ± 6.9                           | 36.5 ± 6.8                          | 0.09                       |
|                                  | Serum Glucose (mg/dL) †                        | 142.6 ± 59.1                         | 144.6 ± 57.0                        | 0.04                       |
|                                  | Inpatient admission 30 days prior              |                                      | 456 (23.3)                          | 1,537 (22.5)               |

Mean ± SD reported for continuous variables; Count (Rate) reported for categorical variables

<sup>a</sup>: First Year=January 2009 – December 2009

<sup>b</sup>: Last Year = October 2014 – September 2015

†: Summary statistics reported among non-missing values

**eTable 5. Characteristics of Veterans Hospitalized with Heart Failure in the First and Last Years of the Study**

| Characteristic                              |                                                | First Year <sup>a</sup><br>(n=20,228) | Last Year <sup>b</sup><br>(n=25,003) | Standardized<br>Difference |
|---------------------------------------------|------------------------------------------------|---------------------------------------|--------------------------------------|----------------------------|
| Age (years)                                 |                                                | 71.3 ± 11.5                           | 71.9 ± 11.2                          | 0.05                       |
| Male                                        |                                                | 19,944 (98.6)                         | 24,566 (98.3)                        | 0.03                       |
| Claims-Based                                | Percutaneous Transluminal Coronary Angioplasty | 1,718 (8.5)                           | 3,105 (12.4)                         | 0.13                       |
|                                             | Coronary Artery Bypass Graft                   | 4,454 (22.0)                          | 4,826 (19.3)                         | 0.07                       |
|                                             | Congestive Heart Failure                       | 15,986 (79.0)                         | 20,353 (81.4)                        | 0.06                       |
|                                             | Acute Myocardial Infarction                    | 1,552 (7.7)                           | 2,096 (8.4)                          | 0.03                       |
|                                             | Ischemic Heart Disease                         | 2,364 (11.7)                          | 3,622 (14.5)                         | 0.08                       |
|                                             | Chronic Atherosclerosis                        | 13,565 (67.1)                         | 16,340 (65.4)                        | 0.04                       |
|                                             | Cardiorespiratory Failure and Shock            | 2,948 (14.6)                          | 5,832 (23.3)                         | 0.22                       |
|                                             | Valvular/Rheumatic Heart Disease               | 4,612 (22.8)                          | 5,892 (23.6)                         | 0.02                       |
|                                             | Hypertension                                   | 17,813 (88.1)                         | 22,463 (89.8)                        | 0.06                       |
|                                             | Stroke                                         | 2,044 (10.1)                          | 2,703 (10.8)                         | 0.02                       |
|                                             | Renal Failure                                  | 9,683 (47.9)                          | 13,885 (55.5)                        | 0.15                       |
|                                             | Chronic Obstructive Pulmonary Disease          | 8,764 (43.3)                          | 11,363 (45.4)                        | 0.04                       |
|                                             | Pneumonia                                      | 4,379 (21.6)                          | 5,911 (23.6)                         | 0.05                       |
|                                             | Diabetes Mellitus with Complications           | 11,978 (59.2)                         | 15,529 (62.1)                        | 0.06                       |
|                                             | Dementia/Senility                              | 2,055 (10.2)                          | 2,943 (11.8)                         | 0.05                       |
|                                             | Functional Disability                          | 1,715 (8.5)                           | 2,251 (9.0)                          | 0.02                       |
|                                             | Peripheral Vascular Disease                    | 5,986 (29.6)                          | 7,716 (30.9)                         | 0.03                       |
|                                             | Cancer                                         | 666 (3.3)                             | 1,039 (4.2)                          | 0.05                       |
|                                             | Trauma                                         | 5,498 (27.2)                          | 7,586 (30.3)                         | 0.07                       |
|                                             | Major Psychiatric Disease                      | 2,662 (13.2)                          | 3,900 (15.6)                         | 0.07                       |
| Chronic Liver Disease                       | 1,122 (5.5)                                    | 2,057 (8.2)                           | 0.11                                 |                            |
| Surgical Admission                          | 735 (3.6)                                      | 1,246 (5.0)                           | 0.07                                 |                            |
| <i>Number of Claims-Based Comorbidities</i> |                                                | 6.0 ± 2.8                             | 6.5 ± 3.0                            | 0.16                       |
| Clinical                                    | Systolic Blood Pressure (mmHg) †               | 126.7 ± 31.0                          | 130.3 ± 29.1                         | 0.12                       |
|                                             | Diastolic Blood Pressure (mmHg) †              | 83.0 ± 25.2                           | 81.4 ± 21.8                          | 0.07                       |
|                                             | Heart Rate †                                   | 80.1 ± 18.4                           | 81.5 ± 18.8                          | 0.08                       |
|                                             | Respiratory Rate †                             | 26.0 ± 33.7                           | 22.3 ± 24.8                          | 0.12                       |
|                                             | Oxygen Saturation (%) †                        | 93.2 ± 15.0                           | 94.6 ± 10.7                          | 0.11                       |
|                                             | Body Mass Index (kg/m <sup>2</sup> ) †         | 30.9 ± 8.0                            | 31.5 ± 7.9                           | 0.08                       |
|                                             | Sodium (mEq/L) †                               | 138.4 ± 4.2                           | 138.3 ± 4.2                          | 0.02                       |
|                                             | Potassium (mEq/L) †                            | 4.2 ± 0.6                             | 4.2 ± 0.6                            | 0.04                       |
|                                             | Blood Urea Nitrogen (mg/dL) †                  | 30.4 ± 17.2                           | 29.8 ± 16.9                          | 0.04                       |
|                                             | Creatinine (mg/dL) †                           | 1.7 ± 0.9                             | 1.7 ± 0.9                            | 0.00                       |
|                                             | B-type Natriuretic Peptide (pg/mL) †           | 1,346.7 ±<br>1,446.4                  | 1,359.8 ±<br>1,592.0                 | 0.01                       |
|                                             | Hematocrit (%) †                               | 36.4 ± 6.0                            | 36.7 ± 6.3                           | 0.06                       |
|                                             | Left Ventricular Ejection Fraction (%) †       | 37.6 ± 15.6                           | 38.4 ± 15.4                          | 0.05                       |

Mean ± SD reported for continuous variables; Count (Rate) reported for categorical variables

<sup>a</sup>: First Year=January 2009 – December 2009

<sup>b</sup>: Last Year = October 2014 – September 2015

†: Summary statistics reported among non-missing values

**eTable 6. Characteristics of Veterans Hospitalized with Pneumonia in the First and Last Years of the Study**

| Characteristic                              |                                                | First Year <sup>a</sup><br>(n=18,049) | Last Year <sup>b</sup><br>(n=20,555) | Standardized<br>Difference |
|---------------------------------------------|------------------------------------------------|---------------------------------------|--------------------------------------|----------------------------|
| Age (years)                                 |                                                | 69.9 ± 12.6                           | 71.6 ± 12.0                          | 0.14                       |
| Male                                        |                                                | 17,546 (97.2)                         | 19,872 (96.7)                        | 0.03                       |
| Claims-Based Comorbid Conditions            | Percutaneous Transluminal Coronary Angioplasty | 737 (4.1)                             | 1,160 (5.6)                          | 0.07                       |
|                                             | Coronary Artery Bypass Graft                   | 1,471 (8.2)                           | 1,492 (7.3)                          | 0.03                       |
|                                             | Congestive Heart Failure                       | 4,951 (27.4)                          | 6,266 (30.5)                         | 0.07                       |
|                                             | Acute Myocardial Infarction                    | 496 (2.7)                             | 609 (3.0)                            | 0.01                       |
|                                             | Ischemic Heart Disease                         | 749 (4.1)                             | 1,103 (5.4)                          | 0.06                       |
|                                             | Chronic Atherosclerosis                        | 6,522 (36.1)                          | 7,506 (36.5)                         | 0.01                       |
|                                             | Cardiorespiratory Failure and Shock            | 2,628 (14.6)                          | 4,752 (23.1)                         | 0.22                       |
|                                             | Hypertension                                   | 13,302 (73.7)                         | 15,623 (76.0)                        | 0.05                       |
|                                             | Stroke                                         | 1,622 (9.0)                           | 1,893 (9.2)                          | 0.01                       |
|                                             | Cerebrovascular                                | 1,898 (10.5)                          | 2,290 (11.1)                         | 0.02                       |
|                                             | Renal Failure                                  | 4,381 (24.3)                          | 6,678 (32.5)                         | 0.18                       |
|                                             | Chronic Obstructive Pulmonary Disease          | 8,790 (48.7)                          | 10,550 (51.3)                        | 0.05                       |
|                                             | Pneumonia                                      | 6,536 (36.2)                          | 8,306 (40.4)                         | 0.09                       |
|                                             | Malnutrition                                   | 837 (4.6)                             | 1,224 (6.0)                          | 0.06                       |
|                                             | Dementia/Senility                              | 2,470 (13.7)                          | 3,301 (16.1)                         | 0.07                       |
|                                             | Functional Disability                          | 1,683 (9.3)                           | 1,958 (9.5)                          | 0.01                       |
|                                             | Peripheral Vascular Disease                    | 3,864 (21.4)                          | 5,028 (24.5)                         | 0.07                       |
|                                             | Cancer                                         | 1,967 (10.9)                          | 2,547 (12.4)                         | 0.05                       |
|                                             | Trauma                                         | 4,992 (27.7)                          | 6,042 (29.4)                         | 0.04                       |
|                                             | Major Psychiatric Disease                      | 3,298 (18.3)                          | 4,151 (20.2)                         | 0.05                       |
|                                             | Chronic Liver Disease                          | 1,035 (5.7)                           | 1,458 (7.1)                          | 0.06                       |
|                                             | Hematological Disorder                         | 498 (2.8)                             | 471 (2.3)                            | 0.03                       |
|                                             | Iron Deficiency                                | 6,483 (35.9)                          | 7,900 (38.4)                         | 0.05                       |
|                                             | Depression                                     | 4,312 (23.9)                          | 5,290 (25.7)                         | 0.04                       |
|                                             | Parkinson's Disease                            | 444 (2.5)                             | 546 (2.7)                            | 0.01                       |
|                                             | Seizure Disorder                               | 882 (4.9)                             | 992 (4.8)                            | 0.00                       |
|                                             | Lung Fibrosis                                  | 1,374 (7.6)                           | 1,696 (8.3)                          | 0.02                       |
|                                             | Asthma                                         | 995 (5.5)                             | 1,229 (6.0)                          | 0.02                       |
|                                             | Vertebral Fracture                             | 205 (1.1)                             | 391 (1.9)                            | 0.06                       |
|                                             | Surgical Admission                             | 738 (4.1)                             | 936 (4.6)                            | 0.02                       |
| <i>Number of Claims-Based Comorbidities</i> |                                                | 5.0 ± 3.1                             | 5.5 ± 3.3                            | 0.16                       |
| Clinical                                    | Systolic Blood Pressure (mmHg) †               | 126.6 ± 23.3                          | 128.6 ± 22.5                         | 0.09                       |
|                                             | Diastolic Blood Pressure (mmHg) †              | 70.6 ± 15.4                           | 71.4 ± 13.7                          | 0.05                       |
|                                             | Heart Rate †                                   | 90.2 ± 19.1                           | 89.9 ± 18.4                          | 0.02                       |
|                                             | Respiratory Rate †                             | 21.8 ± 15.2                           | 20.2 ± 7.4                           | 0.14                       |
|                                             | Oxygen Saturation (%) †                        | 94.3 ± 7.1                            | 94.9 ± 4.0                           | 0.09                       |
|                                             | Body Mass Index (kg/m <sup>2</sup> ) †         | 27.0 ± 7.0                            | 27.5 ± 7.1                           | 0.06                       |
|                                             | Sodium (mEq/L) †                               | 136.6 ± 4.8                           | 136.6 ± 4.8                          | 0.01                       |
|                                             | Potassium (mEq/L) †                            | 4.1 ± 0.6                             | 4.1 ± 0.6                            | 0.00                       |
|                                             | Blood Urea Nitrogen (mg/dL) †                  | 23.8 ± 14.6                           | 23.9 ± 14.5                          | 0.01                       |
|                                             | Creatinine (mg/dL) †                           | 1.4 ± 1.1                             | 1.5 ± 1.3                            | 0.04                       |
|                                             | Hematocrit (%) †                               | 36.4 ± 6.1                            | 36.9 ± 6.4                           | 0.07                       |
|                                             | Serum Glucose (mg/dL) †                        | 136.9 ± 53.4                          | 139.8 ± 54.9                         | 0.06                       |
|                                             | Inpatient admission 30 days prior              | 3,342 (18.5)                          | 4,288 (20.9)                         | 0.06                       |

Mean ± SD reported for continuous variables; Count (Rate) reported for categorical variables

<sup>a</sup>: First Year=January 2009 – December 2009

<sup>b</sup>: Last Year = October 2014 – September 2015

†: Summary statistics reported among non-missing values



**eTable 7. Comparison of Clinical Characteristics Between First and Last Years of Study for Patients Admitted with Heart Failure**

|                                          |                                        |              | <b>First year<br/>(n=20,228)</b> | <b>Last year<br/>(n=25,003)</b> |
|------------------------------------------|----------------------------------------|--------------|----------------------------------|---------------------------------|
| Clinical                                 | Systolic Blood Pressure (mmHg) †       | >140         | 6,561 (33.5)                     | 8,930 (36.3)                    |
|                                          |                                        | <90          | 2,526 (12.9)                     | 2,065 (8.4)                     |
|                                          | Diastolic Blood Pressure (mmHg) †      | >90          | 5,449 (27.3)                     | 5,699 (23.0)                    |
|                                          |                                        | <60          | 2,375 (11.9)                     | 2,326 (9.4)                     |
|                                          | Heart Rate †                           | >100         | 2,568 (12.7)                     | 3,229 (12.9)                    |
|                                          |                                        | <60          | 1,776 (8.8)                      | 1,688 (6.8)                     |
|                                          | Respiratory Rate †                     | >20          | 5,932 (29.6)                     | 5,000 (20.1)                    |
|                                          | Oxygen Saturation (%) †                | <92          | 2,394 (11.9)                     | 2,130 (8.5)                     |
|                                          | Body Mass Index (kg/m <sup>2</sup> ) † | ≥25          | 12,514 (76.9)                    | 17,145 (78.8)                   |
|                                          |                                        | ≥30          | 7,711 (47.4)                     | 11,186 (51.4)                   |
|                                          |                                        | ≤18.5        | 314 (1.9)                        | 334 (1.5)                       |
|                                          | Sodium (mEq/L) †                       | >145         | 452 (2.3)                        | 528 (2.1)                       |
|                                          |                                        | <135         | 2,826 (14.4)                     | 3,793 (15.3)                    |
|                                          | Potassium (mEq/L) †                    | ≥5.5         | 548 (2.8)                        | 563 (2.3)                       |
|                                          |                                        | <3.5         | 1,841 (9.4)                      | 2,259 (9.1)                     |
|                                          | Blood Urea Nitrogen (mg/dL) †          | >20          | 12,734 (66.4)                    | 15,728 (64.9)                   |
|                                          | Creatinine (mg/dL) †                   | >1.5         | 8,296 (41.5)                     | 10,193 (41.0)                   |
|                                          | B-type Natriuretic Peptide (pg/mL) †   | >250         | 15,141 (87.1)                    | 18,642 (85.0)                   |
|                                          | Hematocrit (%) †                       | <30          | 2,742 (14.7)                     | 3,719 (15.0)                    |
| Left Ventricular Ejection Fraction (%) † | ≤40                                    | 8,246 (59.2) | 7,006 (57.2)                     |                                 |

Notes: First year=January 2009-December 2009; Last year=October 2014-September 2015

Count (Rate) reported for all clinical variables and thresholds

†: Summary statistics reported among non-missing values

**eTable 8. Comparison of Clinical Characteristics Between First and Last Years of Study for Patients Admitted with Pneumonia**

|          |                                        |       | Pneumonia                |                         | Pneumonia<br>[excluding Sepsis/RF] |                         |
|----------|----------------------------------------|-------|--------------------------|-------------------------|------------------------------------|-------------------------|
|          |                                        |       | First year<br>(n=18,049) | Last year<br>(n=20,555) | First year<br>(n=16,091)           | Last year<br>(n=13,727) |
| Clinical | Systolic Blood Pressure (mmHg) †       | >140  | 4,640 (26.3)             | 5,760 (28.5)            | 4,268 (27.0)                       | 4,140 (30.5)            |
|          |                                        | <90   | 730 (4.1)                | 526 (2.6)               | 500 (3.2)                          | 198 (1.5)               |
|          | Diastolic Blood Pressure (mmHg) †      | >90   | 1,552 (8.6)              | 1,574 (7.7)             | 1,380 (8.6)                        | 1,029 (7.5)             |
|          |                                        | <60   | 4,022 (22.4)             | 3,780 (18.4)            | 3,381 (21.1)                       | 2,248 (16.4)            |
|          | Heart Rate †                           | >100  | 5008 (27.8)              | 5430 (26.4)             | 4193 (26.1)                        | 2954 (21.5)             |
|          |                                        | <60   | 577 (3.2)                | 561 (2.7)               | 516 (3.2)                          | 409 (3.0)               |
|          | Respiratory Rate †                     | >20   | 6,077 (33.7)             | 5,519 (26.9)            | 5,155 (32.0)                       | 3,105 (22.6)            |
|          | Oxygen Saturation (%) †                | <92   | 2,660 (14.7)             | 2,460 (12.0)            | 2,277 (14.2)                       | 1,529 (11.1)            |
|          | Body Mass Index (kg/m <sup>2</sup> ) † | ≥25   | 9,166 (57.5)             | 11,214 (59.7)           | 8,275 (57.8)                       | 7,665 (60.5)            |
|          |                                        | ≥30   | 4,524 (28.4)             | 5,753 (30.6)            | 4,028 (28.1)                       | 3,876 (30.6)            |
|          |                                        | ≤18.5 | 1,276 (8.0)              | 1,305 (6.9)             | 1,099 (7.7)                        | 838 (6.6)               |
|          | Sodium (mEq/L) †                       | >145  | 393 (2.2)                | 477 (2.3)               | 280 (1.8)                          | 209 (1.5)               |
|          |                                        | <135  | 4,980 (28.3)             | 5,871 (28.7)            | 4,390 (27.9)                       | 3,794 (27.8)            |
|          | Potassium (mEq/L) †                    | ≥5.5  | 358 (2.0)                | 384 (1.9)               | 278 (1.8)                          | 180 (1.3)               |
|          |                                        | <3.5  | 2,050 (11.7)             | 2,252 (11.1)            | 1,816 (11.6)                       | 1,451 (10.7)            |
|          | Blood Urea Nitrogen (mg/dL) †          | >20   | 8,177 (47.6)             | 9,417 (47.4)            | 7,000 (45.6)                       | 5,883 (44.0)            |
|          | Creatinine (mg/dL) †                   | >1.5  | 4,584 (25.6)             | 5,366 (26.2)            | 3,805 (23.9)                       | 3,202 (23.4)            |
|          | Hematocrit (%) †                       | <30   | 2,480 (14.9)             | 3,030 (14.8)            | 2,100 (14.1)                       | 1,778 (13)              |
|          | Serum Glucose (mg/dL) †                | >130  | 7,035 (40.6)             | 8,734 (42.9)            | 6,138 (39.8)                       | 5,497 (40.5)            |
|          |                                        | <70   | 362 (2.1)                | 308 (1.5)               | 298 (1.9)                          | 191 (1.4)               |

Notes: First year=January 2009-December 2009; Last year=October 2014-September 2015

Count (Rate) reported for all clinical variables and thresholds

†: Summary statistics reported among non-missing values

**eTable 9. Comparison of Sociodemographic Characteristics Between First and Last Years for Patients Admitted with Heart Failure or Pneumonia**

|                     |                          | Heart Failure            |                         | Pneumonia                |                         |
|---------------------|--------------------------|--------------------------|-------------------------|--------------------------|-------------------------|
|                     |                          | First year<br>(n=20,228) | Last year<br>(n=25,003) | First year<br>(n=18,049) | Last year<br>(n=20,555) |
| Race/<br>Ethnicity† | Area Deprivation Index † | 105.6±13.9               | 105.3±13.5              | 105.5±13.6               | 105.9±12.7              |
|                     | White                    | 13,894 (69.1)            | 16,746 (67.3)           | 13,902 (77.7)            | 15,851 (77.5)           |
|                     | AA                       | 5,195 (25.8)             | 6,994 (28.1)            | 2,755 (15.4)             | 3,156 (15.4)            |
|                     | Hispanic                 | 684 (3.4)                | 702 (2.8)               | 892 (5.0)                | 1,009 (4.9)             |
|                     | Other                    | 340 (1.7)                | 452 (1.8)               | 338 (1.9)                | 430 (2.1)               |

Notes: First year=January 2009-December 2009; Last year=October 2014-September 2015

Count (Rate) reported for all clinical variables and thresholds

†: Summary statistics reported among non-missing values

**eTable 10. Changes in 30-day Mortality among Veterans Admitted with Pneumonia [excluding Sepsis/RF] and Sepsis/RF [with Pneumonia as Secondary Diagnosis]**

| Adjustment Variables                                             | Measure                                       | Pneumonia<br>[excluding Sepsis/RF] | Sepsis/RF               |
|------------------------------------------------------------------|-----------------------------------------------|------------------------------------|-------------------------|
| Adjusted for Age and Sex                                         | 30-day mortality, %                           |                                    |                         |
|                                                                  | First year                                    | 8.62                               | 33.07                   |
|                                                                  | Last year                                     | 6.12                               | 17.96                   |
|                                                                  | Quarterly Change,<br><i>percentage points</i> | -0.107 (-0.139, -0.075)            | -0.634 (-0.690, -0.579) |
|                                                                  | AUC                                           | 0.652 (0.646, 0.658)               | 0.661 (0.653, 0.668)    |
| Adjusted for Age, Sex and<br>Claims-Based Comorbid<br>Conditions | 30-day mortality, %                           |                                    |                         |
|                                                                  | First year                                    | 8.81                               | 33.23                   |
|                                                                  | Last year                                     | 5.95                               | 17.82                   |
|                                                                  | Quarterly Change,<br><i>percentage points</i> | -0.123 (-0.154, -0.091)            | -0.638 (-0.694, -0.581) |
|                                                                  | AUC                                           | 0.721 (0.716, 0.727)               | 0.712 (0.705, 0.719)    |
| Adjusted for Age, Sex, and<br>Clinical Covariates                | 30-day mortality, %                           |                                    |                         |
|                                                                  | First year                                    | 8.25                               | 30.51                   |
|                                                                  | Last year                                     | 6.57                               | 19.26                   |
|                                                                  | Quarterly Change,<br><i>percentage points</i> | -0.072 (-0.101, -0.043)            | -0.472 (-0.526, -0.417) |
|                                                                  | AUC                                           | 0.747 (0.741, 0.752)               | 0.737 (0.730, 0.744)    |

Notes: First year=January 2009-December 2009; Last year=October 2014-September 2015

Point estimates (95% CIs) for quarterly changes were calculated using the slope of the linear regression between admission quarter and unadjusted/adjusted rates.

Point estimates for clinical models represent average slopes for the linear regression between admission quarter and the adjusted rates among the imputed datasets while standard error estimates used for 95% CIs are the combination of within- and between-imputation variance. We report the AUC (95% CI) for the first imputed dataset for the model with clinical covariates.

**eTable 11. Analyses for Area under the ROC curve (AUC)/Goodness of Fit for Claims-based and Clinical Risk-adjustment Models**

|                                   |                                        | <b>Adjustment Variables</b>                       | <b>Heart Failure</b>    | <b>Pneumonia</b>        | <b>Pneumonia [excluding sepsis/RF]</b> |
|-----------------------------------|----------------------------------------|---------------------------------------------------|-------------------------|-------------------------|----------------------------------------|
| No indicator variables for VAMC   | AUC                                    | Adjusted for Age, Sex and Claims-Based Conditions | 0.677<br>(0.671, 0.682) | 0.697<br>(0.693, 0.702) | 0.713<br>(0.707, 0.718)                |
|                                   |                                        | Adjusted for Age, Sex and Clinical Conditions     | 0.768<br>(0.763, 0.773) | 0.743<br>(0.739, 0.747) | 0.740<br>(0.735, 0.746)                |
|                                   |                                        | <i>Z (p)</i>                                      | 33.34 (<2.2e-16)        | 19.21 (<2.2e-16)        | 9.81 (<2.2e-16)                        |
|                                   | Goodness of Fit Statistic ( <i>p</i> ) | Adjusted for Age, Sex and Claims-Based Conditions | 31.49 (<0.001)          | 170.42 (<0.001)         | 122.4 (<0.001)                         |
|                                   |                                        | Adjusted for Age, Sex and Clinical Conditions     | 7.39 (0.496)            | 9.45 (0.306)            | 9.08 (0.336)                           |
| With indicator variables for VAMC | AUC                                    | Adjusted for Age, Sex and Claims-Based Conditions | 0.689<br>(0.684, 0.694) | 0.709<br>(0.705, 0.713) | 0.721<br>(0.716, 0.727)                |
|                                   |                                        | Adjusted for Age, Sex and Clinical Conditions     | 0.777<br>(0.772, 0.781) | 0.750<br>(0.745, 0.754) | 0.747<br>(0.741, 0.752)                |
|                                   |                                        | <i>Z (p)</i>                                      | 33.65 (<2.2e-16)        | 18.17 (<2.2e-16)        | 9.45 (<2.2e-16)                        |
|                                   | Goodness of Fit Statistic ( <i>p</i> ) | Adjusted for Age, Sex and Claims-Based Conditions | 14.37 (0.073)           | 123.46 (<0.001)         | 98.54 (<0.001)                         |
|                                   |                                        | Adjusted for Age, Sex and Clinical Conditions     | 13.14 (0.107)           | 12.24 (0.141)           | 5.86 (0.663)                           |

The Delong Method was used to conduct a test comparing the AUC's for the claims-based and clinical models. The alternative is that the AUC of the clinical model is greater than the AUC for the claims-based model. The Z and p-values for this test are reported.

Area under the ROC curve, as well as Hosmer-Lemeshow Goodness of Fit test results, was estimated for models that included VAMC indicator variables and models that excluded them. We report the AUC/Goodness of Fit test for the first imputed dataset for the model with clinical covariates

**eTable 12. Sensitivity Analyses for Multiple Admissions – First Admission**

| Adjustment Variables                                       | Measure                                            | Heart Failure           | Pneumonia               | Pneumonia [excluding Sepsis/RF] |
|------------------------------------------------------------|----------------------------------------------------|-------------------------|-------------------------|---------------------------------|
| Adjusted for Age and Sex                                   | 30-day mortality, %                                |                         |                         |                                 |
|                                                            | First year                                         | 6.13                    | 11.05                   | 8.25                            |
|                                                            | Last year                                          | 5.30                    | 10.04                   | 5.96                            |
|                                                            | Quarterly Change (95%CI), <i>percentage points</i> | -0.038 (-0.058, -0.018) | -0.036 (-0.071, -0.001) | -0.098 (-0.134, -0.063)         |
|                                                            | AUC                                                | 0.674 (0.667, 0.682)    | 0.642 (0.637, 0.648)    | 0.656 (0.650, 0.663)            |
| Adjusted for Age, Sex and Claims-Based Comorbid Conditions | 30-day mortality, %                                |                         |                         |                                 |
|                                                            | First year                                         | 6.11                    | 11.28                   | 8.34                            |
|                                                            | Last year                                          | 5.22                    | 9.76                    | 5.81                            |
|                                                            | Quarterly Change (95%CI), <i>percentage points</i> | -0.041 (-0.060, -0.021) | -0.059 (-0.092, -0.027) | -0.110 (-0.147, -0.074)         |
|                                                            | AUC                                                | 0.701 (0.694, 0.709)    | 0.715 (0.710, 0.720)    | 0.727 (0.721, 0.733)            |
| Adjusted for Age, Sex, and Clinical Covariates             | 30-day mortality, %                                |                         |                         |                                 |
|                                                            | First year                                         | 5.62                    | 10.72                   | 7.85                            |
|                                                            | Last year                                          | 5.73                    | 10.65                   | 6.53                            |
|                                                            | Quarterly Change (95%CI), <i>percentage points</i> | -0.002 (-0.022, 0.017)  | -0.002 (-0.033, 0.030)  | -0.058 (-0.090, -0.027)         |
|                                                            | AUC                                                | 0.777 (0.771, 0.784)    | 0.754 (0.749, 0.758)    | 0.750 (0.744, 0.756)            |

Notes: First year=January 2009-December 2009; Last year=October 2014-September 2015

These analyses were conducted on a sample of our study population, where we only include the *first admission for each veteran*. The number of hospitalizations on which these analyses are based on are: 84,769 for heart failure, 105,454 for pneumonia, and 85,462 for pneumonia [excluding sepsis/RF].

Point estimates (95% CIs) for quarterly changes were calculated using the slope of the linear regression between admission quarter and unadjusted/adjusted rates.

Point estimates for clinical models represent average slopes for the linear regression between admission quarter and the adjusted rates among the imputed datasets while standard error estimates used for 95% CIs are the combination of within- and between-imputation variance. We report the AUC for the first imputed dataset for the model with clinical covariates.

**eTable 13. Sensitivity Analyses for Multiple Admissions – Random Admission**

| Adjustment Variables                                       | Measure                                            | Heart Failure           | Pneumonia               | Pneumonia [excluding Sepsis/RF] |
|------------------------------------------------------------|----------------------------------------------------|-------------------------|-------------------------|---------------------------------|
| Adjusted for Age and Sex                                   | 30-day mortality, %                                |                         |                         |                                 |
|                                                            | First year                                         | 8.56                    | 12.84                   | 9.54                            |
|                                                            | Last year                                          | 6.43                    | 10.41                   | 6.18                            |
|                                                            | Quarterly Change (95%CI), <i>percentage points</i> | -0.099 (-0.128, -0.069) | -0.095 (-0.131, -0.059) | -0.145 (-0.180, -0.110)         |
|                                                            | AUC                                                | 0.664 (0.657, 0.671)    | 0.642 (0.637, 0.647)    | 0.656 (0.650, 0.663)            |
| Adjusted for Age, Sex and Claims-Based Comorbid Conditions | 30-day mortality, %                                |                         |                         |                                 |
|                                                            | First year                                         | 8.61                    | 13.12                   | 9.65                            |
|                                                            | Last year                                          | 6.32                    | 10.09                   | 6.03                            |
|                                                            | Quarterly Change (95%CI), <i>percentage points</i> | -0.106 (-0.136, -0.076) | -0.120 (-0.155, -0.086) | -0.157 (-0.193, -0.121)         |
|                                                            | AUC                                                | 0.696 (0.690, 0.703)    | 0.716 (0.711, 0.720)    | 0.727 (0.721, 0.732)            |
| Adjusted for Age, Sex, and Clinical Covariates             | 30-day mortality, %                                |                         |                         |                                 |
|                                                            | First year                                         | 7.92                    | 12.42                   | 9.07                            |
|                                                            | Last year                                          | 6.92                    | 11.01                   | 6.71                            |
|                                                            | Quarterly Change (95%CI), <i>percentage points</i> | -0.056 (-0.085, -0.028) | -0.055 (-0.088, -0.022) | -0.102 (-0.135, -0.069)         |
|                                                            | AUC                                                | 0.777 (0.771, 0.783)    | 0.754 (0.750, 0.759)    | 0.750 (0.744, 0.756)            |

Notes: First year=January 2009-December 2009; Last year=October 2014-September 2015

These analyses were conducted on a sample of our study population, where we only include *one random admission for each veteran*. The number of hospitalizations on which these analyses are based on are: 84,769 for heart failure, 105,454 for pneumonia, and 85,462 for pneumonia [excluding sepsis/RF].

Point estimates (95% CIs) for quarterly changes were calculated using the slope of the linear regression between admission quarter and unadjusted/adjusted rates.

Point estimates for clinical models represent average slopes for the linear regression between admission quarter and the adjusted rates among the imputed datasets while standard error estimates used for 95% CIs are the combination of within- and between-imputation variance. We report the AUC for the first imputed dataset for the model with clinical covariates.
